# Supplementary material
Source: publisher figshare collection journal article supplement (https://karger.figshare.com/ndownloader/files/18107450)
Supplement: Supplementary file 1 [file 18107450]

**Supplementary table 3.** Spearman rank correlation of between birth weight standard deviation score (BWSDS) with maternal variables associated with leptin. Bold text indicates significant association.

| **Variable** | **n** | **Spearman’s Rho** | **p-value** |
| --- | --- | --- | --- |
| Maternal age | 739 | 0.012 | 0.588 |
| Maternal BMI at enrollment | 739 | **0.178** | **0.000** |
| Maternal weight gain | 483 | **0.095** | **0.036** |
